# Supplementary material
Source: publisher figshare collection journal article supplement (https://acs.figshare.com/ndownloader/files/21601044)
Supplement: Supplementary file 1 [file 21601044]

# New Approach with Universal Applicability of Evaluating the Heat Requirements in Solvent Regeneration Process for Post-Combustion CO<sub>2</sub> Capture

Rui Zhang<sup>1,8</sup>, Yiming Zhang<sup>1</sup>, Yi Cheng<sup>1</sup>, Qian Yu<sup>1</sup>, Xiao Luo<sup>3\*</sup>, Chao'en Li<sup>4</sup>, Junhui Li<sup>1</sup>, Zhaogang Zeng<sup>5,8</sup>, Yang Liu<sup>6</sup>, Xiaowen Jiang<sup>7</sup>, Xiayi (Eric) Hu<sup>1,2,8\*</sup>

<sup>1</sup>College of Chemical Engineering, Xiangtan University, Xiangtan, Hunan 411105, P.R. China

<sup>2</sup>Institute for Materials and Processes, School of Engineering, University of Edinburgh, Mayfield Road, Edinburgh EH93JL, UK

<sup>3</sup>College of Chemistry and Chemical Engineering, Hunan University, Changsha, Hunan, 410082, P.R. China

<sup>4</sup>CSIRO Energy, 71 Normanby Road, Clayton North, VIC 3169, Australia

<sup>5</sup>Xiangtan Sepiolite Technology Co., LTD, Xiangtan, Hunan 411100, P. R. China

<sup>6</sup>Hunan BG Well-point Environmental Science & Technology Co., Ltd, Changsha, Hunan 410000, P. R. China

<sup>7</sup>School of Accounting, Capital University of Economics and Business, Beijing, 100070, P. R. China

<sup>8</sup>Hunan Provincial Engineering Research Center of Sepiolite Resource for Efficient Utilization, Xiangtan, Hunan 411100, P. R. China

\* Corresponding Author:

1. Dr. Xiayi Hu, E-mail: [xiayihu@xtu.edu.cn](mailto:xiayihu@xtu.edu.cn)

Tel & Fax: +86-731-58298171

2. Dr. Xiao Luo, E-mail: [x\\_luo@hnu.edu.cn](mailto:x_luo@hnu.edu.cn)

**Figure S1.**

The schematic diagrams for CO<sub>2</sub> absorption experiment, CO<sub>2</sub> desorption experiment and measurement of CO<sub>2</sub> equilibrium solubility are present in the figure S1.

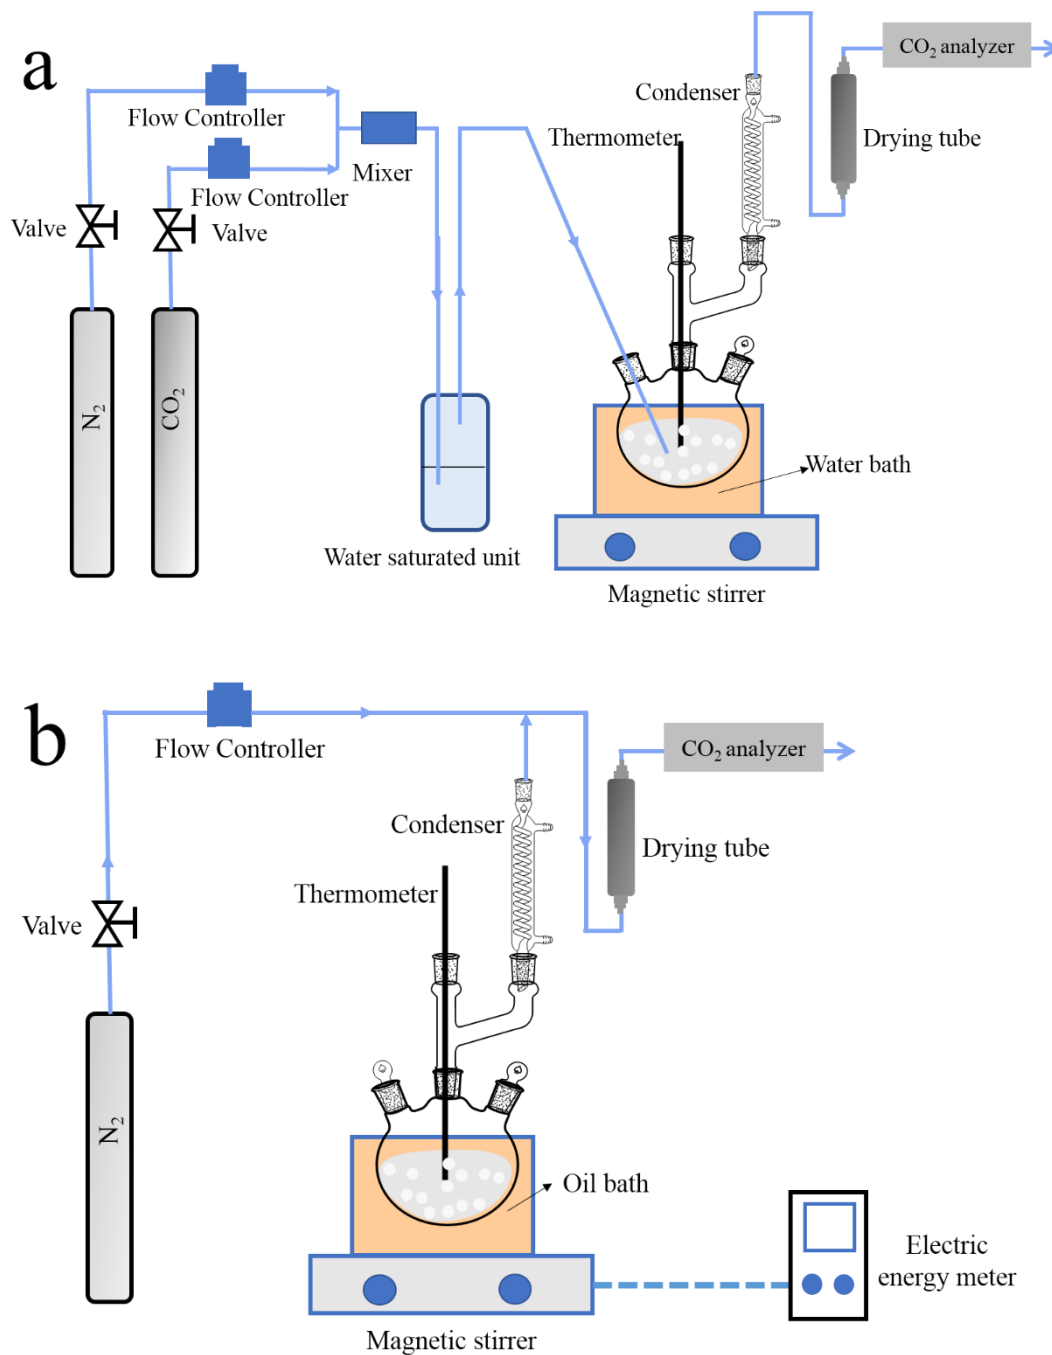

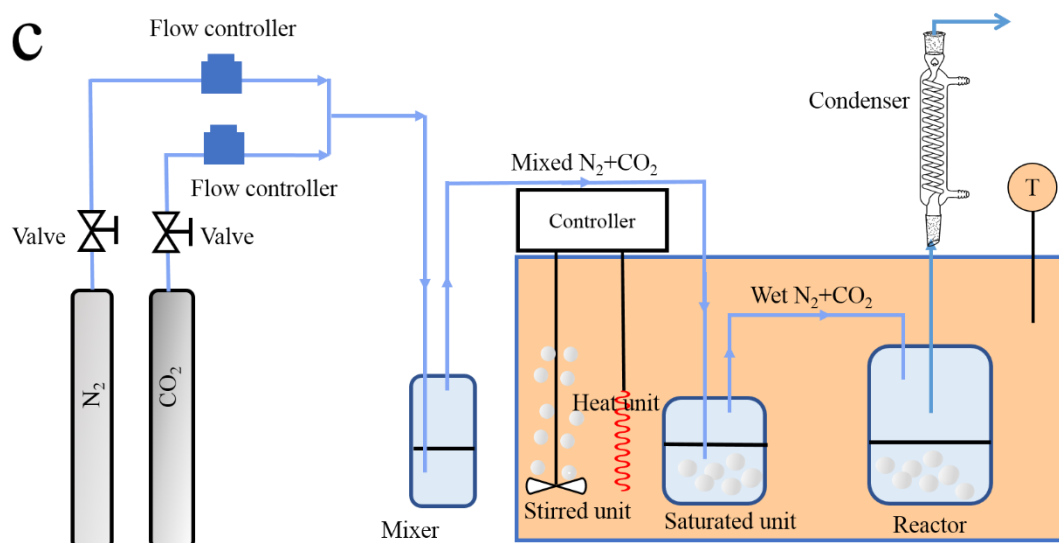

Figure S1. The schematic diagram for CO<sub>2</sub> absorption experiment (a), CO<sub>2</sub> desorption experiment (b) and measurement of CO<sub>2</sub> equilibrium solubility (c).

#### Text S1.

In CO<sub>2</sub> absorption process, 200 mL fresh amine solution is added into a 500 mL flask with three necks, and then a gas mixture (15% CO<sub>2</sub> + 85% N<sub>2</sub>) is bubbled into the reactor with the temperature remains at 313.15 K. The gas is bubbled through a quartz distributor of 100  $\mu$ m to ensure the gas can be evenly distributed into the solution, under stirring at 900 rpm. The CO<sub>2</sub> concentration in the outlet is recorded by a CO<sub>2</sub> analyzer at the intervals of 10 seconds. A saturated unit and a condenser are used to keep the absorption equilibrium inside the reactor.

The CO<sub>2</sub> desorption process is similar to the absorption process, except that only N<sub>2</sub> is bubbled into the reactor for increasing the sensitivity of CO<sub>2</sub> analyzer and the desorption temperature is initiated from 338.15 K. The flask containing 200 mL CO<sub>2</sub> saturated amine solution is immersed into an oil bath with the temperature constant at 338.15 K. At the same time, the stirring system and condenser keep running. The temperature of the oil bath is set up to 363.15 K at the beginning of desorption. The temperature inside the amine solution is recorded in the intervals of 1 minute, the CO<sub>2</sub> concentration of the outlet is measured by the CO<sub>2</sub> analyzer with a 10-second interval. A plug-in power meter (Zhejiang Tepsung Electric Co., Ltd. China) is used to monitor

the energy consumption during the CO<sub>2</sub> desorption process. Absorption or desorption process will be considered to be completed or reach equilibrium when the CO<sub>2</sub> concentration in the gas phase remains unchanging.

In the measurement of the CO<sub>2</sub> solubility at equilibrium, the gases are mixed through a gas-mixer and the saturated unit before bubbling into the reactor. 60 mL fresh amine solution was added into the reactor and then start the measurement. The equilibrium solubilities of tested blends were measured between 313 – 333 K under different CO<sub>2</sub> partial pressures. Each run continues for at least 9 hours to ensure the reaction system reach the equilibrium. The CO<sub>2</sub> equilibrium solubility was measured by titration using 1M aqueous HCl solution<sup>1</sup>. For the final CO<sub>2</sub> loading determination, at least three times titrations were performed with the interval of 30 minutes after reacting for 9 hours. If the last two measurements show the same value of CO<sub>2</sub> loaded, the process is considered to have reached its equilibrium at the corresponding experimental conditions. The last CO<sub>2</sub> loading amount will be regarded as the CO<sub>2</sub> equilibrium solubility at this situation.

## Text S2.

### 1. Dissolved CO<sub>2</sub> concentration determination in the liquid phase

The dissolved CO<sub>2</sub> concentration,  $\alpha$  (mol CO<sub>2</sub>/mol amine), in gas phase is calculated as shown in equations (1) – (4).  $n_{CO_2}$  (mol/min) is the instantaneous absorbed CO<sub>2</sub> amount inside amine solution.  $N_{in}$  and  $N_{out}$  (mol/min) present the instantaneous CO<sub>2</sub> amounts of inlet and outlet, respectively.  $F_{CO_2}$  and  $F_{N_2}$  (mL/min) present the flow rates of CO<sub>2</sub> and N<sub>2</sub>, respectively.  $x$  refers to the CO<sub>2</sub> fraction in the gas outlet.  $V$  (mL) is the volume of tested amine solution (200 mL).  $R_{abs}$  (absorption rate, mol CO<sub>2</sub>/ (L·min)) was calculated by equation (5).

$$n_{CO_2} = N_{in} - N_{out} \quad (1)$$

$$N_{in} = \frac{F_{CO_2}}{22.4} \times \frac{273.15}{273.15+T} \quad (2)$$

$$N_{out} = \frac{F_{N_2} \cdot x}{(1-x) \cdot 22.4} \times \frac{273.15}{273.15+T} \quad (3)$$

$$\alpha = \int_{t_0}^t n_{CO_2} dt \quad (4)$$

$$R_{abs} = \frac{n_{CO_2}}{V \cdot t} \quad (5)$$

In the desorption process, CO<sub>2</sub> loading amount is calculated with equations (6-7).

$$\alpha = \alpha_{rich} - \int_{t_0}^t n_{CO_2} dt \quad (6)$$

$$n_{CO_2} = N_{out} \quad (7)$$

## 2. Cyclic capacity

Cyclic capacity (CC, mol) is the amount of the desorbed CO<sub>2</sub> which was calculated with equation (8).

$$CC = (\alpha_{rich} - \alpha_{lean}) \times C_{amine} \times V \quad (8)$$

## 3. Relative heat duty

The heat duty (H, kJ/mol) is an important parameter to evaluate the amine solvent regeneration performance, which is calculated by equation (9).  $Q_{CO_2}$  (kJ) refers to the required energy for releasing CO<sub>2</sub>, which is measured by the pug-in power meter. Relative heat duty (RH) is defined as the ratio of tested solvent's heat duty relative to MEA's heat duty as shown in equation (10), which indicates the reduction degree of tested amine system's regeneration performance compared to MEA. 6M MEA is set as the reference in this work.

$$H = \frac{Q_{CO_2}}{CC} \quad (9)$$

$$RH = \frac{H_i}{H_{MEA}} \quad (10)$$

**Table S1.** The materials of the chemicals used in this work.

| Chemicals        | Abbreviation     | Mol Wt | Purity (%) | Molecular structure                                                                   |
|------------------|------------------|--------|------------|---------------------------------------------------------------------------------------|
| 1,4-dioxane      | -                | 88.1   | 99.8       | 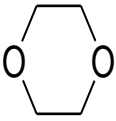 |
| Deuterium oxide  | D <sub>2</sub> O | 20.03  | 99.9       |  |
| Monoethanolamine | MEA              | 61.08  | 99%        |  |

|                            |        |        |     |                                                                                     |
|----------------------------|--------|--------|-----|-------------------------------------------------------------------------------------|
| Benzylamine                | BZA    | 107.15 | 99% | 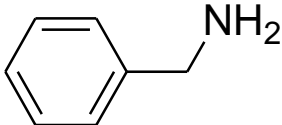 |
| 2-Dimethylaminoethanol     | DMEA   | 89.14  | 99% |  |
| 2-(Diethylamino)ethanol    | DEEA   | 117.19 | 99% |  |
| 1-Dimethylamino-2-propanol | 1DMA2P | 103.16 | 99% |  |

1. Official Methods of Analysis of the Association of Official Analytical Chemists. *Journal of Pharmaceutical Sciences* **1971**, 60, (2), 334.
